# Supplementary material
Source: PubMed Central journal article supplement (PMC4104231)
Supplement: NIHMS601532-supplement-01.pdf [file NIHMS601532-supplement-01.pdf]

## SUPPLEMENTAL FIGURES

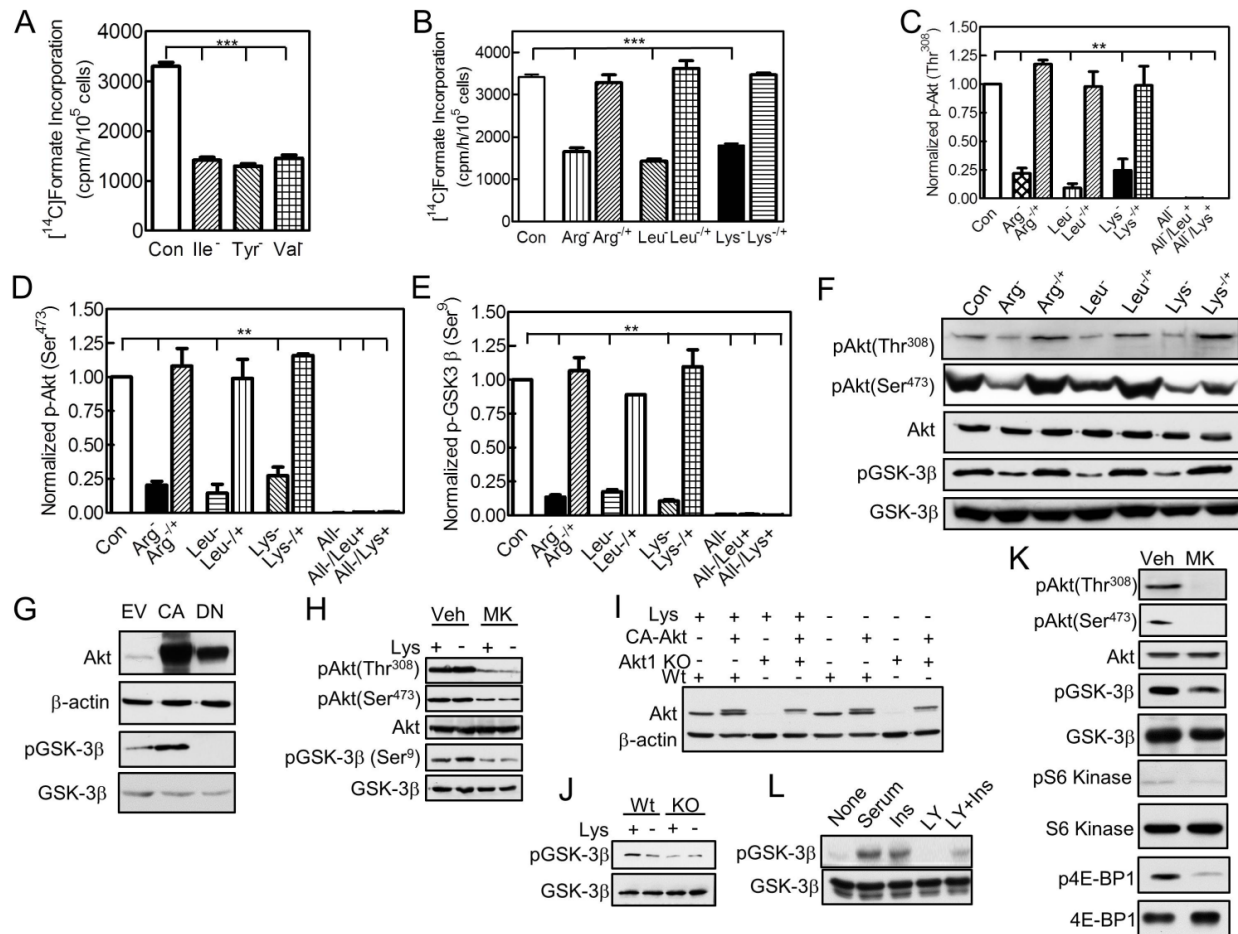

**Figure S1, Related to Figure 1. Amino Acids Regulate *de novo* Purine Synthesis via Akt**

(A) HeLa or (B) HCT116 cells were incubated for 3 h in full medium (Con) or medium lacking (A) isoleucine-, tyrosine-, or valine, or (B) arginine, leucine, or lysine; in the latter case, the deficient amino acid was added back for 1 h. Rates of *de novo* purine synthesis were measured as described in Figure 1A; data are the means  $\pm$  S.E. of three independent experiments performed in duplicate. (C-E) Blots from three independent experiments described in Figure 1B were analyzed by densitometric scanning; (C) p-Akt(Thr<sup>308</sup>), (D) p-Akt(Ser<sup>473</sup>) and (E) p-GSK-3β. (F) HCT116 cells were incubated as described in B, and Akt Thr<sup>308</sup> and Ser<sup>473</sup> phosphorylation, and GSK-3β Ser<sup>9</sup> phosphorylation were assessed by immunoblotting. (G) Expression of CA- and DN-Akt in HeLa cells was assessed by immunoblotting, and Akt activity was assessed by GSK-3β Ser<sup>9</sup> phosphorylation. (H) HeLa cells were transfected with CA-Akt for 24 h, followed by a 3 h incubation in full (Lys +) or lysine-deficient (Lys -) medium containing vehicle (0.1% DMSO, Veh) or 1 μM MK2206 (MK). Akt Thr<sup>308</sup>, Akt Ser<sup>473</sup>, and GSK-3β phosphorylation and total GSK-3β protein were assessed by immunoblotting. (I, J) Wild type and Akt1 knock out (KO) MEFs were incubated for 3 h in lysine-deficient or sufficient media, and (I) Akt and β-actin protein, and (J) GSK-3β Ser<sup>9</sup> phosphorylation and total GSK-3β were assessed by immunoblotting; some of the cells in I had been transfected 24 h earlier with CA-Akt. (K) HeLa cells were treated with vehicle (0.1% DMSO, Veh) or 1 μM MK2206 (MK) for 3 h, and Akt Thr<sup>308</sup>, Akt Ser<sup>473</sup>, GSK-3β, S6 kinase, and 4EBP1 phosphorylation or total protein were assessed by immunoblotting. (L) HeLa cells were incubated in serum-deficient medium, and then treated with serum, insulin, LY294002, or LY294002 plus insulin as described in Figure 1F. GSK-3β Ser<sup>9</sup> phosphorylation and total GSK-3β were assessed by immunoblotting. \*, \*\*, and \*\*\* indicate p < 0.05, 0.01, and 0.001, respectively.

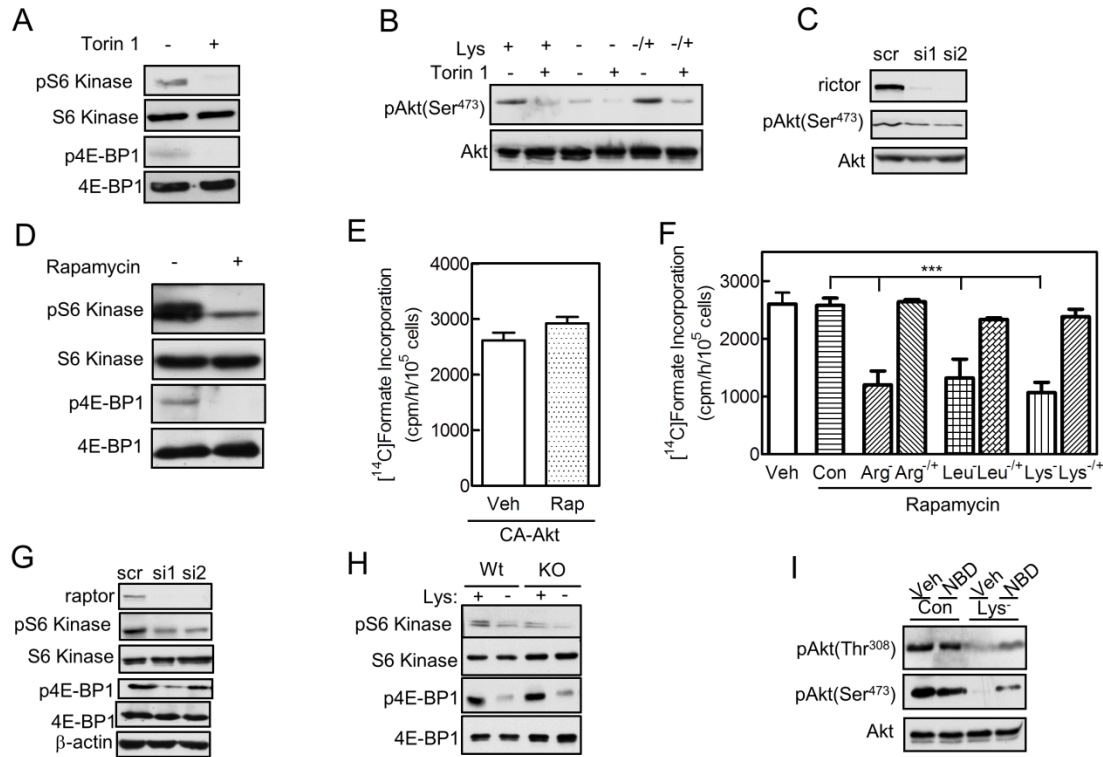

**Figure S2. Related to Figure 2. Amino Acids Regulate Akt and Purine Synthesis via mTORC2 and IκB Kinase**

(A,B) HeLa cells were treated with 250 nM Torin-1 as described in Figure 2A, and assessed for (A) S6 kinase and 4E-BP1, and (B) Akt Ser<sup>473</sup> phosphorylation by immunoblotting. In (B), some cells were deprived of lysine and then some were reconstituted with lysine. (C) HeLa cells were transfected with two different rictor siRNAs (si1 and si2) or a scrambled siRNA (scr) as described in Figure 2B, and rictor and total Akt expression and Akt Ser<sup>473</sup> phosphorylation were assessed by immunoblotting. (D) HeLa cells were treated with rapamycin as described in Figure 2C, and assessed for S6 kinase and 4E-BP1 expression and phosphorylation by immunoblotting. (E) HeLa cells were transfected with CA-Akt, and 24 h later received vehicle (Veh, 0.1% DMSO) or 10 nM rapamycin (Rap); rates of purine synthesis were then measured over 3 h. (F) The experiment described in Figure 2C with HeLa cells was performed with HCT 116 cells. (G) HeLa cells were transfected with two different raptor siRNAs (si1 and si2) or a scrambled siRNA (scr) as described in Figure 2D, and assessed for raptor, S6 kinase, 4E-BP1, and β-actin expression, and S6 kinase and 4E-BP1 phosphorylation by immunoblotting. (H) Wild type and Akt1 knock-out (KO) cells were deprived of lysine for 3 h, and S6 kinase and 4E-BP1 expression and phosphorylation were assessed by immunoblotting. (I) HeLa cells were treated with vehicle (Veh, 0.1% DMSO) or 100 μM NBD peptide (NBD) as described in Figure 2F, and assessed for total Akt and Akt Thr<sup>308</sup> and Ser<sup>473</sup> phosphorylation by immunoblotting. \*\*\* indicate p < 0.001.

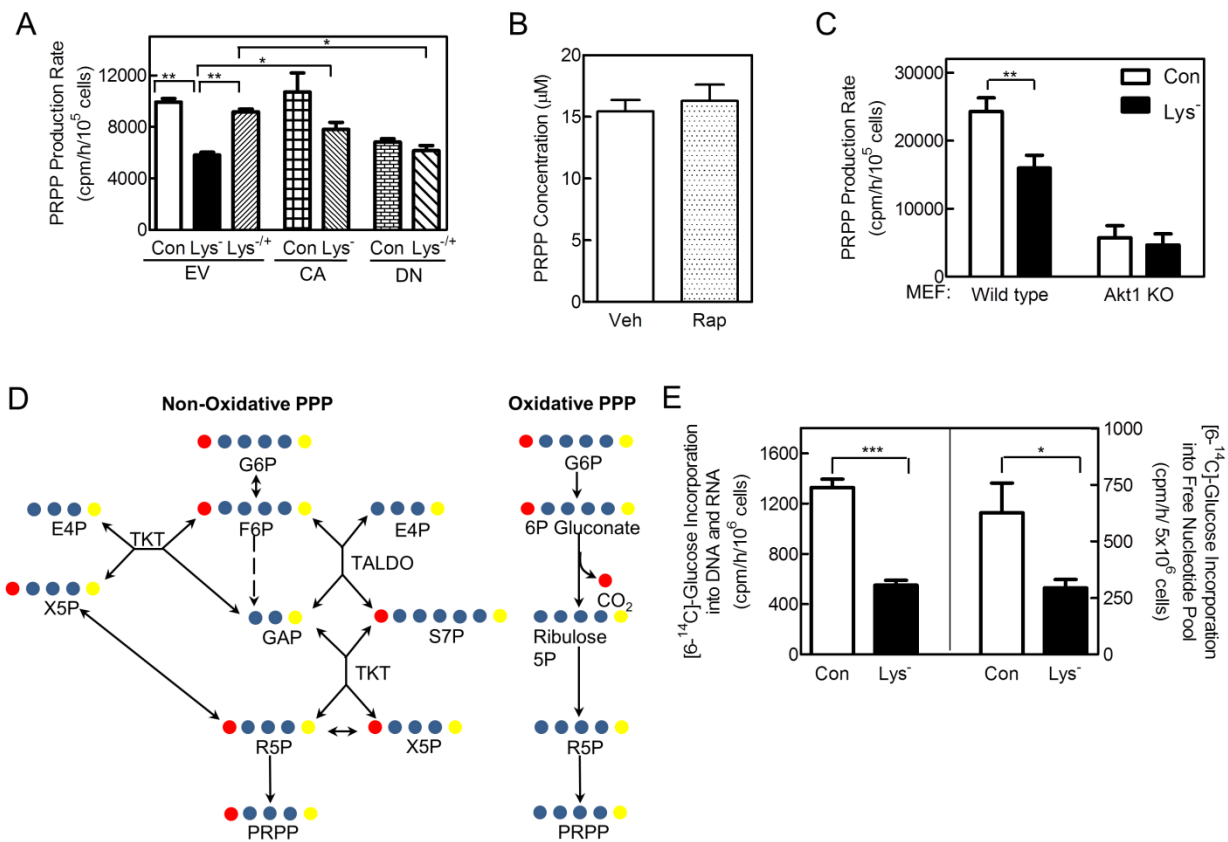

**Figure S3, Related to Figure 3. Amino Acids Regulate PRPP Production by the Non-oxidative PPP via Akt**

**(A)** HeLa cells were transfected and incubated as described in Figure 3A. Cellular PRPP production in intact cells was measured over 1 h by following [8-<sup>14</sup>C]adenine incorporation into adenylates. Con, control; EV, empty vector; CA, CA-Akt; DN, DN-Akt. **(B)** HeLa cells were treated with vehicle (Veh, 0.1% DMSO) or 10 nM rapamycin (Rap) for 3 h, and then the intracellular PRPP concentration was measured as described in Figure 3A. **(C)** Wild type and Akt1 knock out (KO) cells were incubated in full (Con) or lysine-deficient (Lys<sup>-</sup>) medium for 3 h, and then cellular PRPP production was measured as described in A. **(D)** Carbon flow through the oxidative and non-oxidative pentose phosphate pathway is depicted diagrammatically; the fate of carbon one (red circles) and six (yellow circles) of glucose 6-phosphate (G6P) is shown. F6P, fructose 6-phosphate; E4P, erythrose 4-phosphate; X5P, xylulose 5-phosphate; S7P, sedoheptulose 7-phosphate; GAP, glyceraldehyde 3-phosphate; R5P, ribose 5-phosphate; PRPP, phosphoribosylpyrophosphate; TKT, transketolase; TALDO, transaldolase. **(E)** Carbon flow through both the oxidative and non-oxidative pentose phosphate pathways was measured by following [6-<sup>14</sup>C]glucose incorporation into DNA and RNA (left half) and the free purine nucleotide pool (right half). \*, \*\*, and \*\*\* indicate p < 0.05, 0.01, and 0.001, respectively.

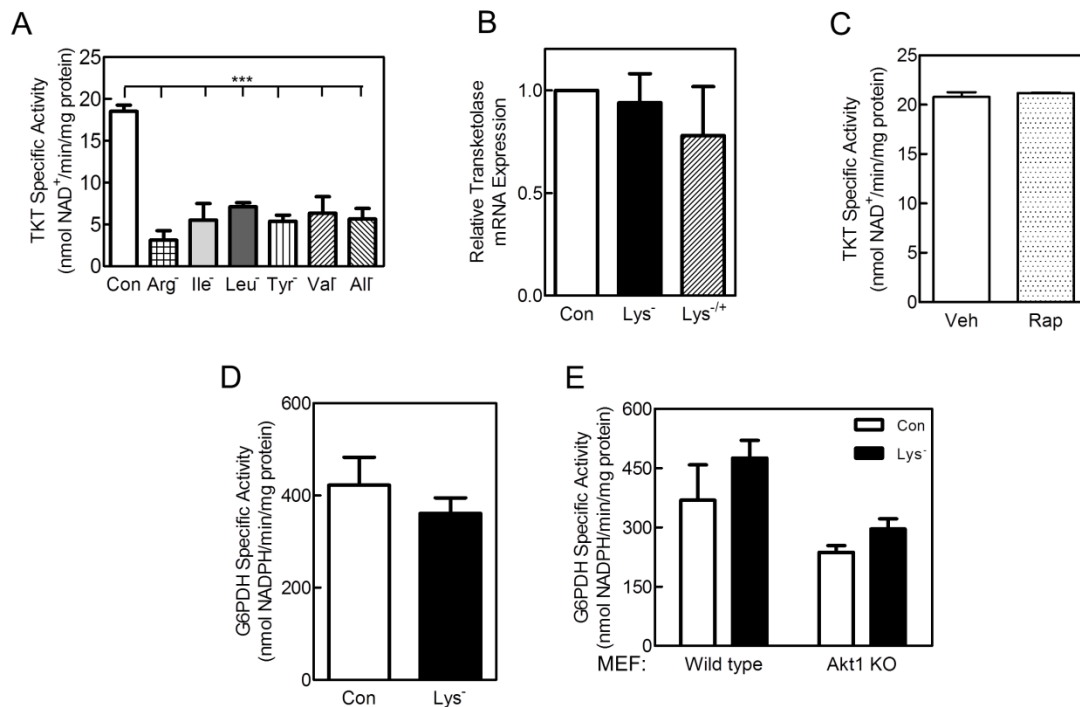

**Figure S4, Related to Figure 4. TKT Activity and mRNA Expression, and Glucose 6-phosphate Dehydrogenase Activity During Amino Acid Deprivation**

(A) HeLa cells were incubated for 3 h in full medium (Con) or in medium lacking arginine, isoleucine, leucine, tyrosine, valine, or all essential amino acids, and TKT activity was measured in cell extracts as described in Figure 4A. (B) HeLa cells were incubated in full medium (Con) or lysine-deficient medium (Lys<sup>-</sup>), with some of the latter cells reconstituted with lysine (Lys<sup>-/+</sup>). TKT mRNA was measured by RT-qPCR using glyceraldehyde 3-phosphate dehydrogenase mRNA as an internal control. (C) HeLa cells were treated for 3 h with vehicle (Veh, 0.1% DMSO) or 10 nM rapamycin (Rap), and then TKT activity was measured as described in Figure 4A. (D,E) HeLa (D) or MEF (E) (wild type or Akt1 knock out) cells were incubated in full (Con) or lysine-deficient (Lys<sup>-</sup>) or medium for 3 h. Glucose 6-phosphate dehydrogenase (G6PDH) activity was measured in cell lysates based on a coupled reaction of NADP conversion to NADPH. In panel A, \*\*\* indicates  $p < 0.001$  between control and the amino acid-deficient conditions; in the other four panels, no significant differences were found between control and lysine-deficient or rapamycin-treated conditions.

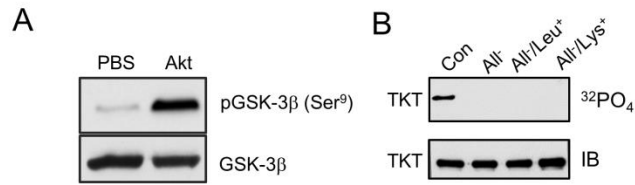

**Figure S5, Related to Figure 5. Phosphorylation of GSK-β by Constitutively-Active Akt and *in vivo* TKT Phosphorylation**

**(A)** Phosphate-buffered saline (PBS) or constitutively-active Akt (Akt) and 1 mM ATP were added to HeLa cell lysates at room temperature, and 30 min later SDS sample buffer was added. Phosphorylated GSK-3β(Ser<sup>9</sup>) (upper blot) or total GSK-3β (lower blot) were assessed by immunoblotting. **(B)** *In vivo* phosphorylation of TKT was assessed as described in Figure 5E in cells that had been cultured either in full medium (Con) or in medium lacking all essential amino acids; leucine or lysine were added to some of the amino acid-deprived cells.

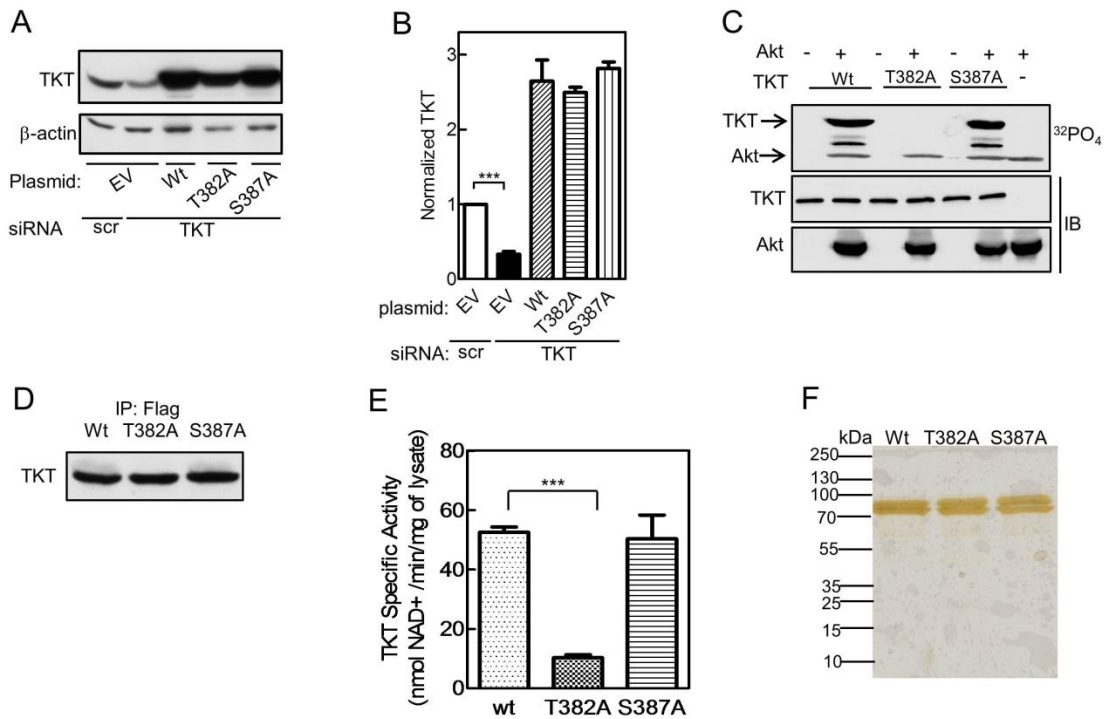

**Figure S6. Related to Figure 6. TKT Thr<sup>382</sup> Is an Akt Phosphorylation Site Critical to Enzyme Activity and Purine Synthesis**

(A,B) HeLa cells were transfected with scrambled (scr) or a TKT-specific siRNA, and 48 h later they were transfected with empty vector (EV) or Flag-tagged wild type (Wt) or T382A or S387A mutant TKT. TKT and  $\beta$ -actin were assessed in cell lysates by immunoblotting. **A** shows a representative blot, and **B** shows a summary of three blots, with TKT expression in cells transfected with the scr siRNA and EV plasmid adjusted to a value of one (all conditions were normalized to the  $\beta$ -actin loading control). **(C)** Experiment was performed similarly to Figure 6E, except we included the S387A mutant TKT and used purified wild type Akt instead of CA-Akt, the latter to show that wild type Akt, as well as CA-Akt, phosphorylated wild type TKT. The two bands between TKT and Akt could be TKT break-down products or bacterial proteins phosphorylated by Akt. **(D,E)** Same experiment as in A,B, except anti-Flag antibody was added to the lysates, and TKT **(D)** protein and **(E)** activity in the immunoprecipitates was assessed. Wt, wild type. **(F)** His-tagged wild type and T382A and S387A mutant TKT were purified from *E. Coli*, and analyzed by SDS-PAGE and silver staining of the gels. TKT migrates on SDS gels with an apparent molecular weight of 78 kDa. \*\*\* indicates  $p < 0.001$ .

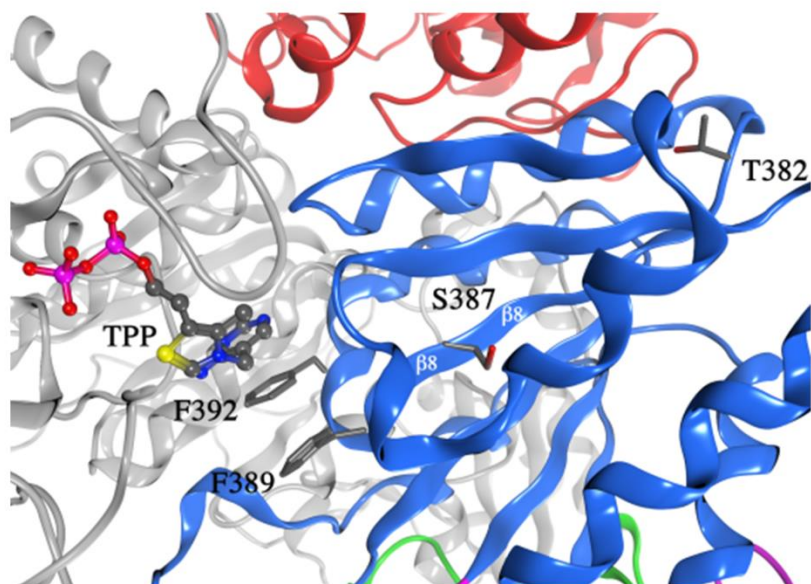

**Figure S7, Related to Figure 6.** Close-up view of the TKT dimer interface between the aminopyrimidine-binding (Pyr) and pyrophosphate-binding (PP) domains, which form the TPP cofactor and substrate-binding sites (ribbon representation; pdb 3MOS). One monomer is shown in grey, while the other monomer is colored by domain: PP domain in red and Pyr domain in blue. The Pyr domain comprises a parallel six-stranded  $\beta$ -sheet and three helices on each side, with Thr<sup>382</sup> on the turn preceding the  $\beta$ 8 strand and Ser<sup>387</sup> on the strand. At the end of the  $\beta$ 8 strand is a connecting 3/10 helix containing the aromatic residues Phe<sup>389</sup> and Phe<sup>392</sup>. These residues are critically important in binding the aminopyrimidine ring of thiamine pyrophosphate (TPP), the latter through a  $\pi$ -stacking arrangement (Mitschke, et al, 2010).

## SUPPLEMENTAL TABLES

**Table S1, Related to Figure 3. Metabolite Analysis from HeLa Cells**

HeLa cells were cultured for 3 h in full medium (Con) or medium lacking lysine (Lys<sup>-</sup>), with some lysine-deficient cells reconstituted with lysine for 1 h (Lys<sup>-/+</sup>). Cell extracts were analyzed by LC/MS-MS, with 150 identified and 384 unidentified metabolites analyzed (Budczies et al, 2013)]. The data are expressed as the ratio of the value for the indicated metabolite from cells in the lysine-deficient medium (or lysine-reconstituted medium) to that in full medium, and were analyzed by a paired one-tailed Student t test. The nine metabolites that yielded a significant difference ( $p < 0.05$ ) between the full and lysine-deficient medium are shown (first nine entries), while only representative examples of metabolites yielding a non-significant difference are shown (no unidentified metabolites yielded a significant difference between control and lysine-deprived cells). None of the metabolites from cells reconstituted with lysine showed a significant difference from cells in full medium.

| Metabolite         | $\frac{\text{Lys}^-}{\text{Con}}$ | $p$ value | $\frac{\text{Lys}^{-/+}}{\text{Con}}$ | $p$ value |
|--------------------|-----------------------------------|-----------|---------------------------------------|-----------|
| Inosine            | 0.18                              | <0.05     | 1.08                                  | >0.05     |
| Guanosine          | 0.27                              | <0.05     | 1.24                                  | >0.05     |
| Hypoxanthine       | 0.19                              | <0.05     | 0.90                                  | >0.05     |
| Lysine             | 0.12                              | <0.001    | 0.85                                  | >0.05     |
| Nicotinamide       | 0.10                              | <0.05     | .85                                   | >0.05     |
| Ribose             | 0.14                              | <0.05     | 1.26                                  | >0.05     |
| Uridine            | 0.24                              | <0.05     | 1.13                                  | >0.05     |
| Uracil             | 0.27                              | <0.05     | 0.92                                  | >0.05     |
| Xanthine           | 0.43                              | <0.05     | 1.15                                  | >0.05     |
| Adenosine          | 0.39                              | >0.05     | 1.24                                  | >0.05     |
| Aspartic Acid      | 0.97                              | >0.05     | .845                                  | >0.05     |
| Cholesterol        | 1.49                              | >0.05     | .97                                   | >0.05     |
| Glucose            | 1.69                              | >0.05     | 1                                     | >0.05     |
| Glutamine          | 1.37                              | >0.05     | 1.25                                  | >0.05     |
| Glycine            | 0.95                              | >0.05     | 0.9                                   | >0.05     |
| Pyruvic Acid       | 1                                 | >0.05     | 1.29                                  | >0.05     |
| Serine             | 1.13                              | >0.05     | 0.93                                  | >0.05     |
| Tryptophan         | 1.12                              | >0.05     | 1.03                                  | >0.05     |
| Urea               | 1.26                              | >0.05     | 0.9                                   | >0.05     |
| Thymine            | 1.32                              | >0.05     | 1.22                                  | >0.05     |
| Tyrosine           | 1.07                              | >0.05     | 1.01                                  | >0.05     |
| Valine             | 1.17                              | >0.05     | 0.99                                  | >0.05     |
| 3-phosphoglycerate | 1.40                              | >0.05     | 1.05                                  | >0.05     |



**Table S2. Akt Substrates Lacking an Arginine at -5 Position**

The table lists five human proteins (other than TKT described in this work) documented to be Akt substrates, both *in vitro* and *in vivo*. They all have the invariant arginine at the -3 position, but do not have an arginine at the -5 position.

| Gene name                                           | Accession Number | Phosphorylated Sequence                                                              | Reference             |
|-----------------------------------------------------|------------------|--------------------------------------------------------------------------------------|-----------------------|
| TKT (human)                                         | AAH 08615.1      | GCATRNR <b>p</b> TVPF (pThr382)                                                      | this manuscript       |
| Beta1-catenin (human)                               | NP_001895.1      | QDIQRRT <b>p</b> SMGG (pSer552)                                                      | Fang et al, 2007      |
| Yes-associated protein (human YAP-1)                | NP_001123617     | PQHVR <b>AH</b> <b>p</b> SSPA (pSer127)                                              | Basu et al, 2003      |
| p47-Phox (human)                                    | AAF 34737.1      | GAPP <b>RR</b> S <b>p</b> SIRN (Ser 304)<br>QDA <b>Y</b> RRN <b>p</b> SVRF (Ser 328) | Hoyal et al, 2003     |
| ATP-citrate synthase (human isoform-1)              | NP_001087.2      | PAP <b>S</b> RTA <b>p</b> SFSE (pSer454)                                             | Berwick et al, 2002   |
| cAMP-response element-binding protein (human CREB1) | NP_604391.1      | <u>EIL</u> <b>S</b> RR <b>p</b> SYRK (pSer133)                                       | Du and Montmini, 1998 |

**Table S3, Related to Figure 7. Mouse Organ Weights**

Mice were fed either normal chow (Con) or the same chow lacking lysine (Lys<sup>-</sup>) for two days, and then were euthanized, and their livers, kidneys, and spleens were removed and weighed immediately. Data represent the mean  $\pm$  SE from six mice in each group.

|                  | Liver        | Kidney       | Spleen     |
|------------------|--------------|--------------|------------|
|                  | (mg)         | (mg)         | (mg)       |
| Con              | 960 $\pm$ 81 | 342 $\pm$ 17 | 81 $\pm$ 5 |
| Lys <sup>-</sup> | 842 $\pm$ 54 | 345 $\pm$ 14 | 86 $\pm$ 8 |

**Table S4, Related to Figure 7. Plasma Amino Acid Concentrations in Mice**

Mice were fed either normal chow (Con) or the same chow lacking lysine (Lys<sup>-</sup>) for two days, and then were euthanized, and blood was removed by cardiac puncture. Plasma was analyzed for amino acids on an Hitachi amino acid analyzer. Data represent the mean  $\pm$  SE from six mice in each group. Lysine was the only amino acid that showed a significant difference between control and lysine-deprived animals.

| Amino acid     | Con<br>( $\mu$ M)                | Lys <sup>-</sup><br>( $\mu$ M)   | P value           |
|----------------|----------------------------------|----------------------------------|-------------------|
| Alanine        | 504 $\pm$ 58.2                   | 400 $\pm$ 73.3                   | P > 0.05          |
| Arginine       | 73.9 $\pm$ 14.4                  | 92.5 $\pm$ 12.8                  | P > 0.05          |
| Asparagine     | 55.3 $\pm$ 8.51                  | 42 $\pm$ 5.41                    | P > 0.05          |
| Aspartate      | 15.8 $\pm$ 0.735                 | 17 $\pm$ 2.87                    | P > 0.05          |
| Cysteine       | 3.09 $\pm$ 0.576                 | 1.48 $\pm$ 0.258                 | P > 0.05          |
| Glutamate      | 41.3 $\pm$ 9.08                  | 35.7 $\pm$ 4.23                  | P > 0.05          |
| Glycine        | 617 $\pm$ 67.9                   | 525 $\pm$ 87.9                   | P > 0.05          |
| Isoleucine     | 79.1 $\pm$ 11.4                  | 74.7 $\pm$ 11.9                  | P > 0.05          |
| Leucine        | 112 $\pm$ 20.45                  | 119 $\pm$ 16                     | P > 0.05          |
| <b>Lysine</b>  | <b>414 <math>\pm</math> 44.6</b> | <b>194 <math>\pm</math> 28.8</b> | <b>P&lt;0.001</b> |
| Methionine     | 90.8 $\pm$ 12.2                  | 71.9 $\pm$ 23.6                  | P > 0.05          |
| Phenyl-alanine | 70.5 $\pm$ 12.5                  | 72.5 $\pm$ 9.11                  | P > 0.05          |
| Proline        | 91.6 $\pm$ 13.7                  | 75 $\pm$ 5.1                     | P > 0.05          |
| Serine         | 191 $\pm$ 15                     | 182 $\pm$ 25.9                   | P > 0.05          |
| Threonine      | 301 $\pm$ 25                     | 251 $\pm$ 53.5                   | P > 0.05          |
| Tryptophan     | 79.6 $\pm$ 7.52                  | 68.5 $\pm$ 3.59                  | P > 0.05          |
| Tyrosine       | 92.7 $\pm$ 13.4                  | 58.6 $\pm$ 8.38                  | P > 0.05          |
| Valine         | 208 $\pm$ 26.8                   | 180 $\pm$ 31.9                   | P > 0.05          |
